# Supplementary material for: Optical sensors based on functionalized mesoporous silica SBA-15 for the detection of multianalytes (H+ and Cu2+) in water
Source: Royal Society of Chemistry journal article supplement (doi:10.1039/b708857d), 2007-01-01
Supplement: b708857d.pdf [file b708857d.pdf]

# Optical sensors based on functionalized mesoporous silica SBA-15 for the detection of multianalyte ( $H^+$ and $Cu^{2+}$ ) in water

Le-Le Li, Hao Sun, Cheng-Jie Fang, Jun Xu, Jing-Yi Jin, and Chun-Hua Yan\*

Beijing National Laboratory for Molecular Sciences, State Key Lab of Rare Earth Materials Chemistry and Applications & PKU-HKU Joint Lab in Rare Earth Materials and Bioinorganic Chemistry, Peking University, Beijing 100871, China

## 1. The $^{13}C$ MAS-NMR spectrum of 2-MPT-SBA-15

As shown in Figure S1, the detail analysis of the  $^{13}C$  MAS-NMR spectrum of 2-MPT-SBA-15 directly verifies the presence of the intermediate, trimethoxysilane-derivative of 2-MPT, and its successful immobilization.<sup>S1</sup>

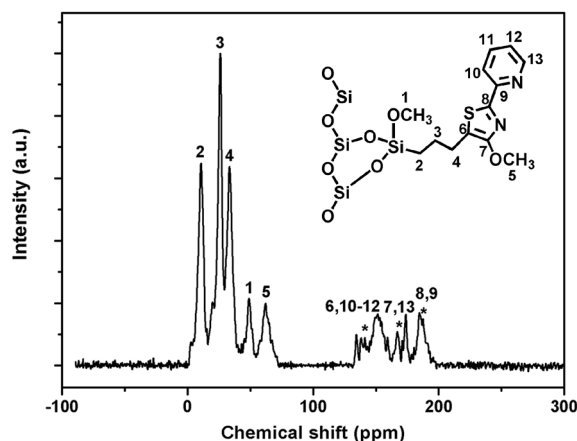

Fig. S1 Detail analysis of the  $^{13}C$  MAS-NMR spectrum of 2-MPT-SBA-15

## 2. The formation constant for the interaction of 2-MPT-SBA-15 with Cu(II)

In this work, we applied the similar method reported in the previous literatures (ref. S2) to determine the formation constant for the interaction of 2-MPT-SBA-15 with Cu(II).

When 2-MPT-SBA-15 and Cu(II) coexisted, there should be the coordination equilibrium in the solution as follows:

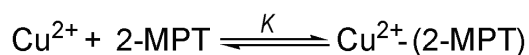

Assuming the initial concentration of ligand 2-MPT is  $[L]_0$ , the concentration of the uncomplexed ligand [2-MPT] in the solution is  $[L]$ , and the concentration of  $Cu^{2+}$  is  $[M]$ , the binding constant could be represented as Eq. 1.

$$K = (1 - \alpha) / (\alpha [Cu^{2+}]) \quad (1)$$

The introduced  $\alpha$  (Eq. 2, defined as the ratio between  $[L]$  and  $[L]_0$ ), could be directly related to the measured fluorescence intensity values  $F$ , where  $F_0$  and  $F_1$  are the limiting fluorescence values for  $\alpha = 1$  (in the absence of  $Cu^{2+}$ ) and  $\alpha = 0$  (fully complexed 2-MPT).

$$\alpha = (F - F_1) / (F_0 - F_1) \quad (2)$$

In Figure S2,  $\alpha$  is given as a function of the logarithm of  $\text{Cu}^{2+}$  ion concentration. The curve fitting for the experimental data points was calculated from Yang's equations with  $\log K = 4.42$ .<sup>S2a</sup> The curve can serve as the calibration curve for the detection of  $\text{Cu}^{2+}$ .

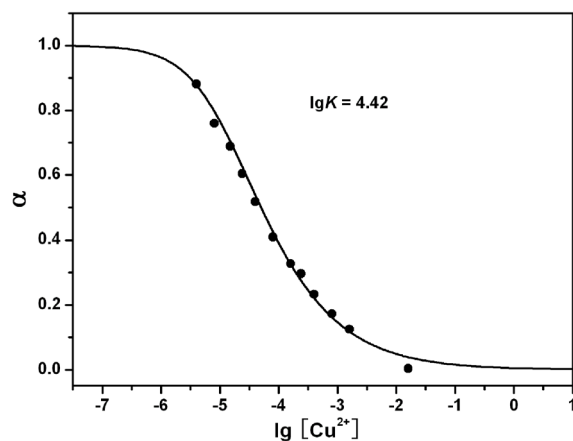

**Fig. S2** Response parameter values ( $\alpha$ ) as a function of the logarithm of  $\text{Cu}^{2+}$  concentration.  $\alpha$  is defined as the ratio between the free ligand concentration and the initial concentration of ligand.

## References

- S1. (a) C. D. Nunes, A. A. Valente, M. Pillinger, A. C. Fernandes, C. C. Romão, J. Rocha and I. S. Gonçalves, *J. Mater. Chem.*, 2002, **12**, 1735; (b) D. Pérez-Quintanilla, I. Hierro, M. Fajardo and I. Sierra, *J. Mater. Chem.*, 2006, **16**, 1757.
- S2. (a) R. H. Yang, K. A. Li, K. M. Wang, F. L. Zhao, N. Li and F. Liu, *Anal. Chem.*, 2003, **75**, 612; (b) W. H. Chan, R. H. Yang and K. M. Wang, *Anal. Chim. Acta*, 2001, **444**, 261.
